# Supplementary material
Source: publisher figshare collection journal article supplement (https://acs.figshare.com/ndownloader/files/4470139)
Supplement: Supplementary file 1 [file 4470139]

## Supporting Information

# Is $[\text{FeO}]^{2+}$ the Active Center also in Iron Containing Zeolites? A Density Functional Theory Study of Methane Hydroxylation Catalysis by Fe–ZSM-5 Zeolite

Angela Rosa\*<sup>1</sup>, Giampaolo Ricciardi\*<sup>1</sup> and Evert Jan Baerends\*<sup>2,3</sup>

<sup>1</sup>*Dipartimento di Chimica, Università della Basilica, Via N. Sauro 85, 85100 Potenza, Italy*

<sup>2</sup>*Dep. of Chemistry, Pohang Univ. of Science and Technology, Pohang 790-784, South-Korea*

<sup>3</sup>*Theoretische Chemie, Vrije Universiteit Amsterdam, De Boelelaan 1083, 1081 HV Amsterdam, The Netherlands*

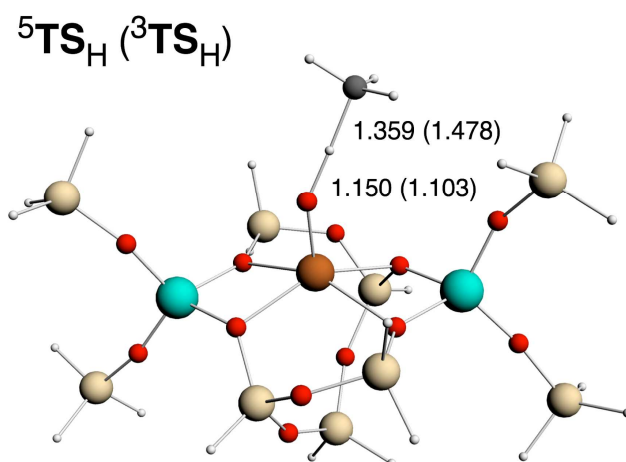

$\text{Fe}-\text{O}_{\text{ax}} = 1.719$  (1.694)  
 $\angle \text{FeO}_{\text{ax}}\text{H} = 145.4$  (119.7)

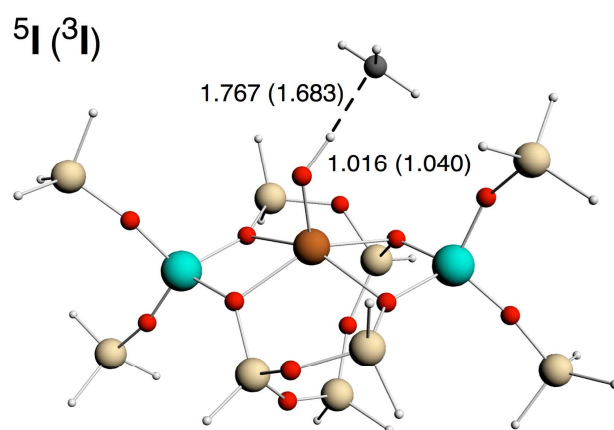

$\text{Fe}-\text{O}_{\text{ax}} = 1.768$  (1.714)  
 $\angle \text{FeO}_{\text{ax}}\text{H} = 129.8$  (117.2)

**Figure S1.** DFT/BP86/def2-TZVP optimized geometries (Å and degrees) of the species involved in the H-abstraction from methane by  $^{3,5}\text{1}$ .

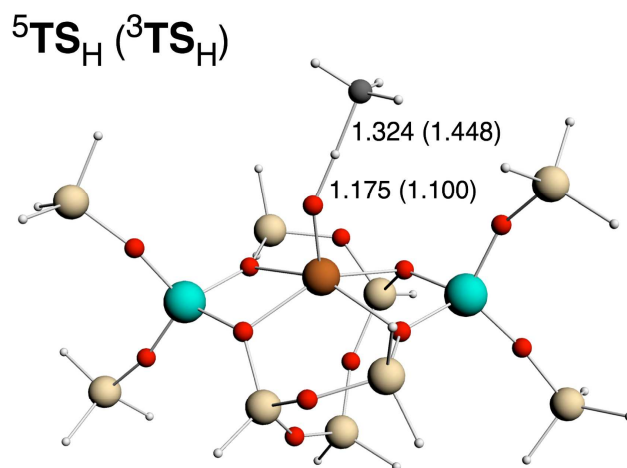

$\text{Fe}-\text{O}_{\text{ax}} = 1.702$  (1.672)  
 $\angle \text{FeO}_{\text{ax}}\text{H} = 139.6$  (121.3)

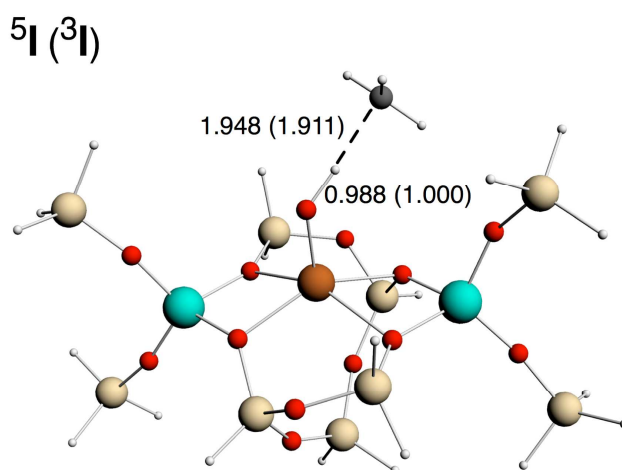

$\text{Fe}-\text{O}_{\text{ax}} = 1.761$  (1.705)  
 $\angle \text{FeO}_{\text{ax}}\text{H} = 123.2$  (115.2)

**Figure S2.** DFT/ZORA/OPBE/TZ2P optimized geometries (Å and degrees) of the species involved in the H-abstraction from methane by  $^{3,5}\text{1}$ .

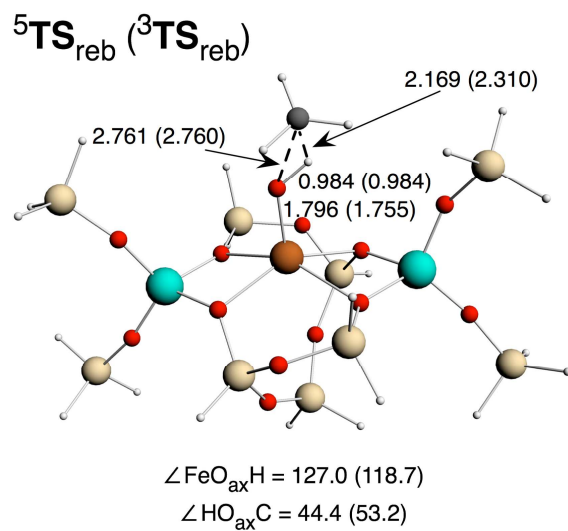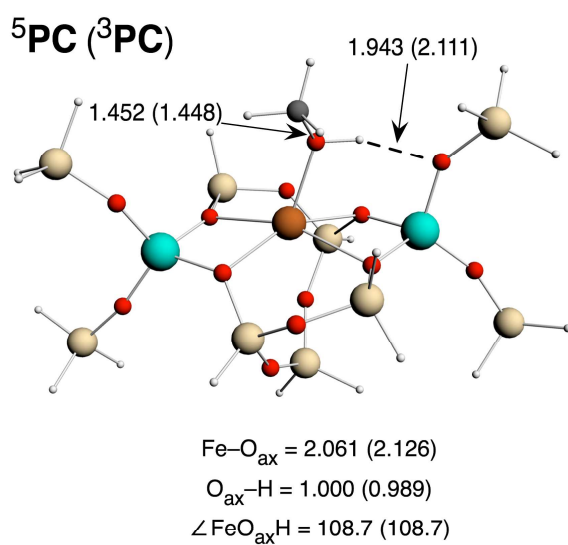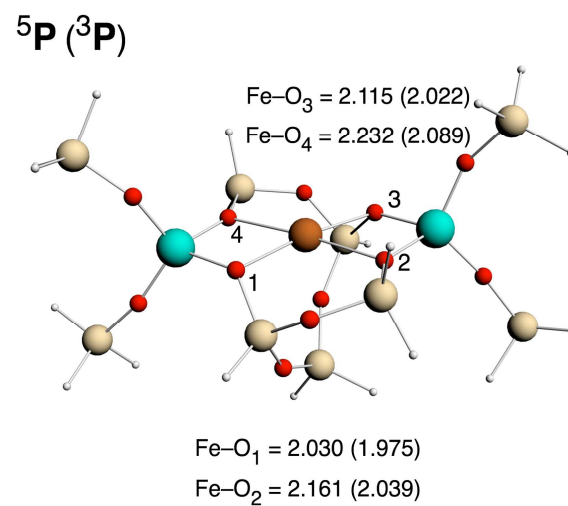

**Figure S3.** DFT/BP86/def2-TZVP optimized geometries (Å and degrees) of the species involved in the rebound phase of methane hydroxylation by <sup>3,5</sup>1.

$^5\text{PC } (^3\text{PC})$

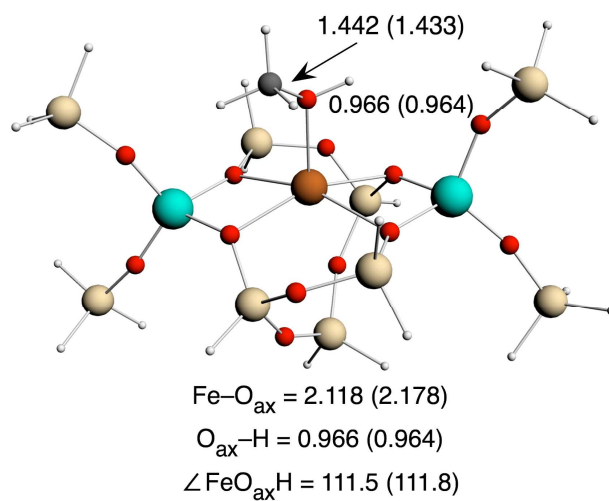

$^5\text{P } (^3\text{P})$

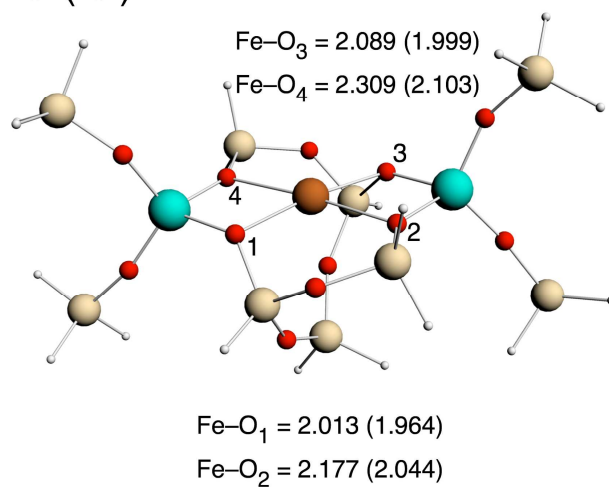

**Figure S4.** DFT/ZORA/OPBE/TZ2P optimized geometries (Å and degrees) of the species involved in the H-abstraction from methane by  $^{3,5}\mathbf{1}$

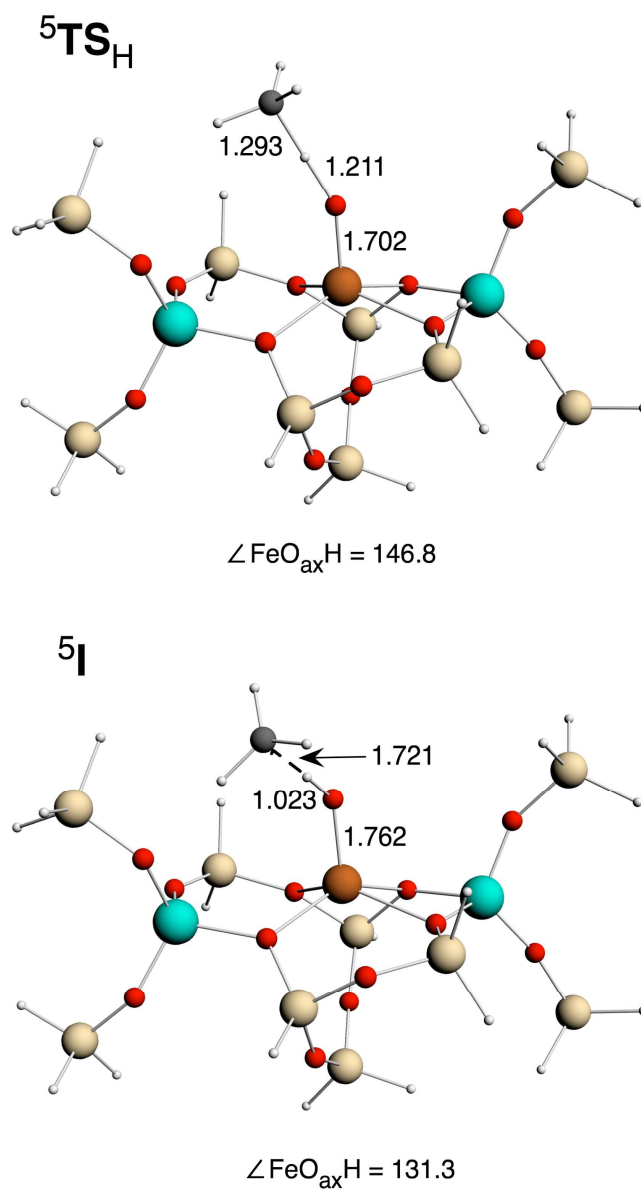

**Figure S5.** DFT/BP86/def2-TZVP optimized geometries (Å and degrees) of the species involved in the H-abstraction from methane by  $^5\mathbf{2}$ .

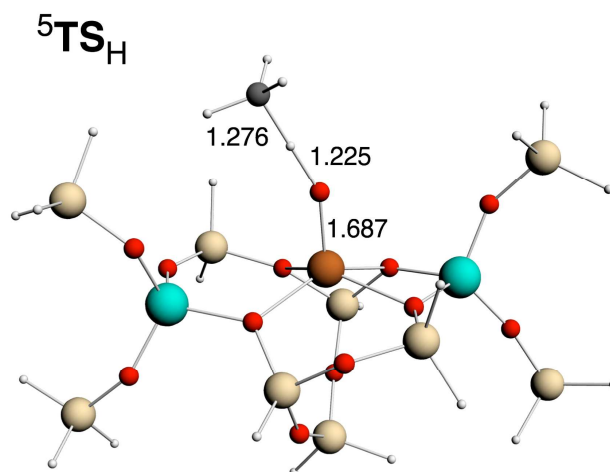

$$\angle \text{FeO}_{\text{ax}}\text{H} = 141.8$$

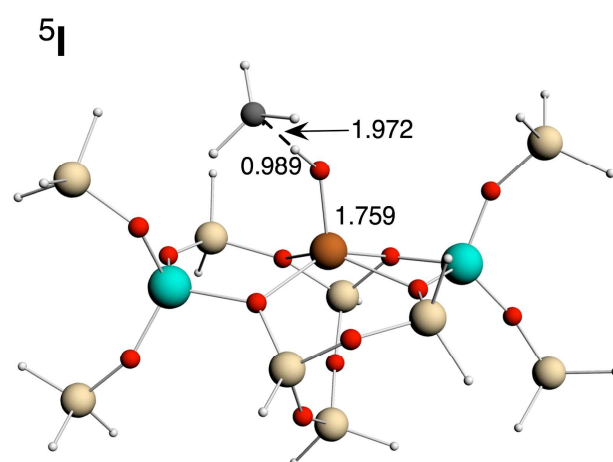

$$\angle \text{FeO}_{\text{ax}}\text{H} = 123.5$$

**Figure S6.** DFT/ZORA/OPBE/TZ2P optimized geometries (Å and degrees) of the species involved in the H-abstraction from methane by <sup>5</sup>**2**.

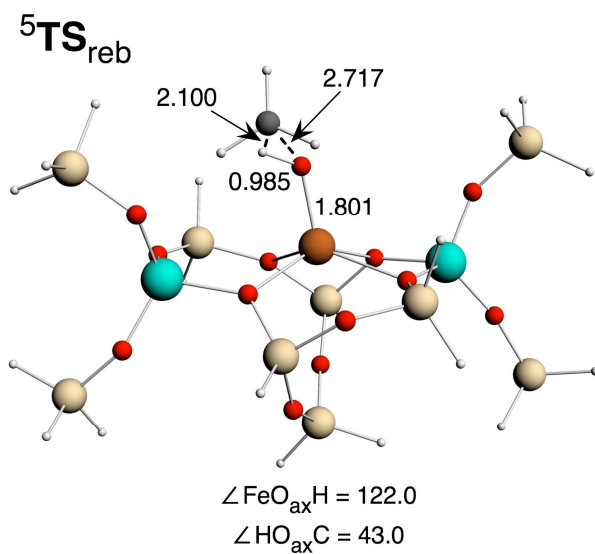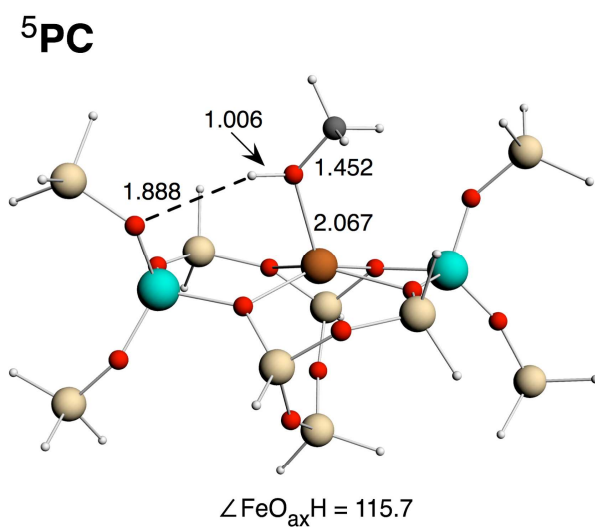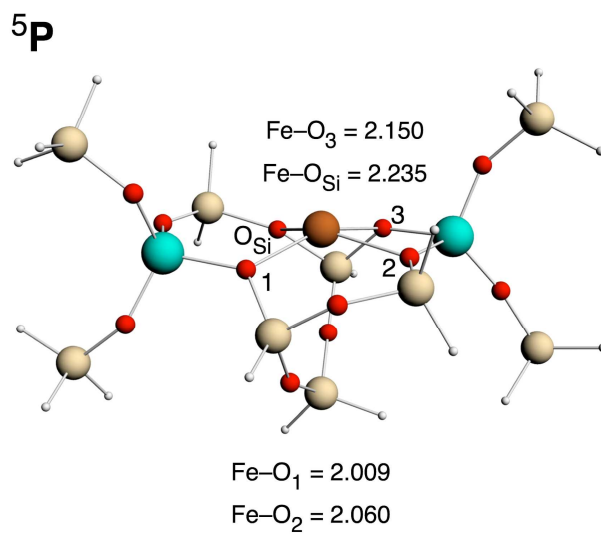

**Figure S7.** DFT/BP86/def2-TZVP optimized geometries (Å and degrees) of the species involved in the rebound phase of methane hydroxylation by <sup>5</sup>**2**.



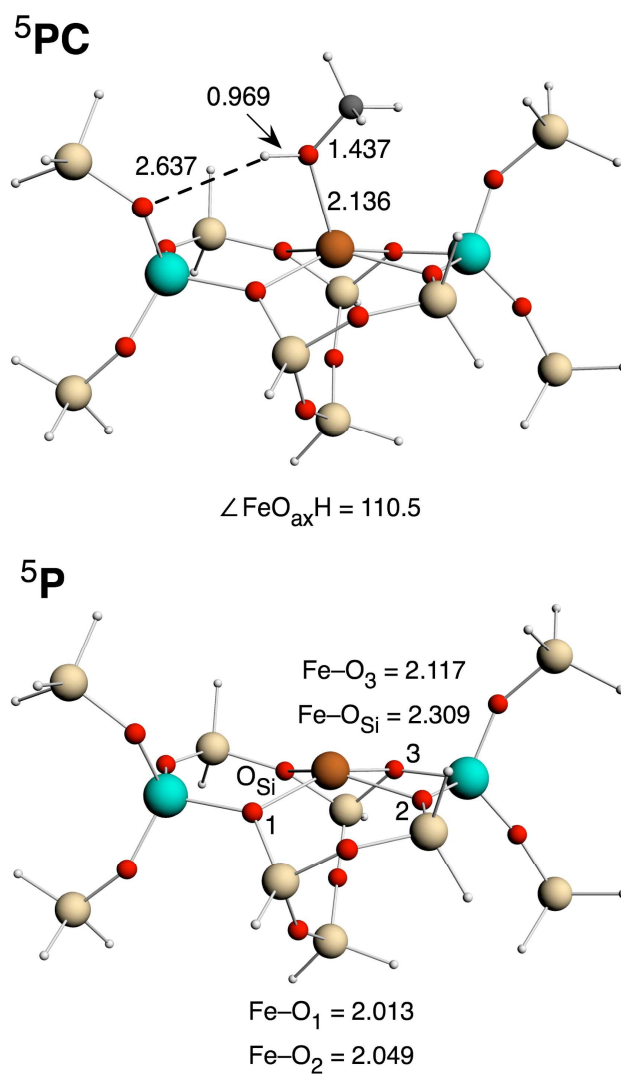

**Figure S8.** DFT/ZORA/OPBE/TZ2P optimized geometries (Å and degrees) of the species involved in the rebound phase of methane hydroxylation by <sup>5</sup>**2**.
